# Supplementary material for: Blockade of TRIM59 enhances esophageal cancer cell chemosensitivity to cisplatin by upregulating p53
Source: PubMed Central journal article supplement — Oncol Lett. 2020 Nov 3;21(1):6. doi: 10.3892/ol.2020.12267 (PMC7681221; doi:10.3892/ol.2020.12267), 2020-11-03

Figure S1. Transfection efficiency of siTP53. TP53 (A) mRNA and (B) protein expression levels were determined via reverse transcription-quantitative PCR and western blotting, respectively. \* $P < 0.05$  vs. siNC. si, small interfering RNA; TP53, tumor protein p53; NC, negative control.

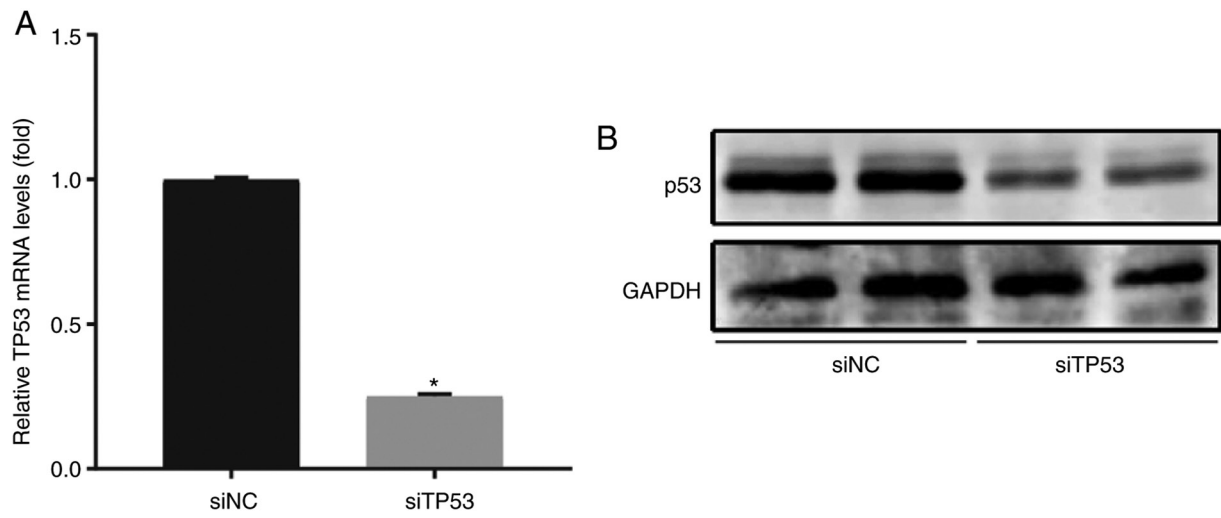

Supplement: Supplementary_Data.pdf [file Supplementary_Data.pdf]
